# Supplementary material
Source: PubMed Central journal article supplement (PMC3887461)
Supplement: Supp_Table1.pdf [file Supp_Table1.pdf]

**Supplementary Table S1. Protein S-Guanylation in Solubilized Mitochondria Treated *In Vitro* with 8-Nitro-cGMP Determined by Means of Immunoaffinity Capture and LC-MS/MS**

| Acc no. <sup>a</sup> | Protein name                                 | Mw <sup>b</sup> | pI <sup>c</sup> | Cys no. <sup>d</sup> | Peptide sequence                           | Ions score <sup>e</sup> |
|----------------------|----------------------------------------------|-----------------|-----------------|----------------------|--------------------------------------------|-------------------------|
| P68255               | 14-3-3 protein theta                         | 27761           | 4.69            | 25                   | YDDMATCMK                                  | 35                      |
| P63102               | 14-3-3 protein zeta/delta                    | 27754           | 4.73            | 25                   | YDDMAACMK                                  | 32                      |
| P13233               | 2',3'-Cyclic-nucleotide 3'-phosphodiesterase | 47239           | 9.03            | 111                  | LDEDLAGYCR                                 | 57                      |
| P62250               | 40S ribosomal protein S16                    | 16435           | 10.21           | 25                   | TATAVAHCK                                  | 57                      |
| P05765               | 40S ribosomal protein S21                    | 9122            | 8.71            | 56                   | TYGICGAIR                                  | 31                      |
| P62859               | 40S ribosomal protein S28                    | 7836            | 10.7            | 27                   | TGSQGQCTQVR                                | 33                      |
| P63039               | 60 kDa heat shock protein, mitochondrial     | 60917           | 5.91            | 442                  | AAVEEGIVLGGGCALLR                          | 81                      |
| P19945               | 60S acidic ribosomal protein P0              | 34194           | 5.91            | 27                   | CFIVGADNVGSK                               | 36                      |
| P19944               | 60S acidic ribosomal protein P1              | 11491           | 4.28            | 61                   | ALANVNIGSLICNVGAGGPAPAAGAAPAGGPAPSAAAAPAEK | 34                      |
| Q6PDV7               | 60S ribosomal protein L10                    | 24588           | 10.11           | 105                  | MLSCAGADR                                  | 37                      |
| P62907               | 60S ribosomal protein L10a                   | 24816           | 9.94            | 164                  | VLCLAVAVGHVK                               | 36                      |
| P23358               | 60S ribosomal protein L12                    | 17835           | 9.48            | 141                  | EILGTAQSVGCNVDGR                           | 74                      |
| Q63507               | 60S ribosomal protein L14                    | 23324           | 11.11           | 42                   | ALVDGPCTR                                  | 34                      |
| P18445               | 60S ribosomal protein L27a                   | 16608           | 11.12           | 70                   | NQSFCTVNLDK                                | 40                      |
| P21531               | 60S ribosomal protein L3                     | 46107           | 10.22           | 114                  | TVFAEHISDECK                               | 37                      |
| P50878               | 60S ribosomal protein L4                     | 47227           | 10.92           | 96                   | SGQGAFGNMCR                                | 42                      |
| P60711               | Actin, cytoplasmic 1                         | 41710           | 5.29            | 217                  | LCYVALDFEQEMATAASSSSLEK                    | 36                      |
| P60711               | Actin, cytoplasmic 1                         | 41710           | 5.29            | 257                  | FRCPEALFQPSFLGMESCGIHETTFNSIMK             | 72                      |
| P60711               | Actin, cytoplasmic 2                         | 41710           | 5.29            | 272                  | CPEALFQPSFLGMESCGIHETTFNSIMK               | 49                      |
| Q05962               | ADP/ATP translocase 1                        | 32968           | 9.81            | 160                  | EFNGLGDCLTK                                | 27                      |
| Q05962               | ADP/ATP translocase 1                        | 32968           | 9.81            | 257                  | GADIMYTGTVDCWR                             | 51                      |

|        |                                                                           |        |       |     |                                          |    |
|--------|---------------------------------------------------------------------------|--------|-------|-----|------------------------------------------|----|
| Q09073 | ADP/ATP translocase 2                                                     | 32880  | 9.74  | 257 | KGTDIMYTGTLDCWR                          | 28 |
| P31399 | ATP synthase subunit d, mitochondrial                                     | 18752  | 6.17  | 101 | NCAQFVTGSQAR                             | 32 |
| Q06647 | ATP synthase subunit O, mitochondrial                                     | 23383  | 10.03 | 141 | GEVPCTVTTAFPLDEAVLSELK                   | 32 |
| P37397 | Calponin-3                                                                | 36412  | 5.47  | 173 | CASQAGMTAYGTR                            | 46 |
| P18418 | Calreticulin                                                              | 47966  | 4.33  | 105 | HEQNIDCGGGYVK                            | 58 |
| P18418 | Calreticulin                                                              | 47966  | 4.33  | 137 | DMHGDSEYNIMFGPDICGPGTK                   | 35 |
| P18418 | Calreticulin                                                              | 47966  | 4.33  | 163 | CKDDEFTHLYTLIVRPDNTYEVK                  | 34 |
| Q9Z0W7 | Chloride intracellular channel protein 4                                  | 28615  | 5.92  | 100 | IEEFLEEVLCPPK                            | 49 |
| Q00657 | Chondroitin sulfate proteoglycan 4                                        | 251754 | 5.27  | 534 | APVPSCLR                                 | 42 |
| P47875 | Cysteine and glycine-rich protein 1                                       | 20600  | 8.9   | 122 | CSQAVYAAEK                               | 32 |
| P47875 | Cysteine and glycine-rich protein 1                                       | 20600  | 8.9   | 167 | GLESTTLADKDGGEIYCK                       | 42 |
| Q68FY0 | Cytochrome b-c1 complex subunit 1, mitochondrial                          | 52815  | 5.57  | 268 | HQQLDLAQDHFSSVSQVYEEDAVPSITPCR           | 34 |
| P47942 | Dihydropyrimidinase-related protein 2                                     | 62239  | 5.95  | 248 | SITIANQTNCPPLYVTK                        | 79 |
| P07153 | Dolichyl-diphosphooligosaccharid e--protein glycosyltransferase subunit 1 | 68262  | 6.05  | 475 | VACITEQVLTLVNK                           | 34 |
| P63170 | Dynein light chain 1, cytoplasmic                                         | 10359  | 6.89  | 56  | YNPTWHCIVGR                              | 40 |
| P62630 | Elongation factor 1-alpha 1                                               | 50082  | 9.1   | 234 | DGSASGTTLLEALDCILPPTRPTDKPLR             | 56 |
| P62630 | Elongation factor 1-alpha 1                                               | 50082  | 9.1   | 370 | NDPPMEAAGFTAQVILNHPGQISAGYAPVLDCHTAHIACK | 30 |
| P62630 | Elongation factor 1-alpha 3                                               | 50082  | 9.1   | 411 | SGDAAIVDMVPGKPMCVESFSDYPLGR              | 76 |
| P05197 | Elongation factor 2                                                       | 95223  | 6.41  | 41  | STLTDSLVC                                | 37 |
| Q9JJ22 | Endoplasmic reticulum aminopeptidase 1                                    | 106351 | 6.08  | 896 | CVQQTIEEENIR                             | 41 |
| P52555 | Endoplasmic reticulum resident protein ERp29                              | 28557  | 6.23  | 157 | GQGVYLGMPGCLPAYDALAGQFIEASSR             | 39 |

|        |                                                                  |        |      |      |                         |    |
|--------|------------------------------------------------------------------|--------|------|------|-------------------------|----|
| Q66HD0 | Endoplasmin                                                      | 92713  | 4.72 | 645  | LTESPCALVASQYGWSGNMER   | 35 |
| P11762 | Galectin-1                                                       | 14847  | 5.14 | 43   | DSNNLCLHFNPR            | 37 |
| P10860 | Glutamate dehydrogenase 1, mitochondrial                         | 61377  | 8.05 | 112  | IHKPCNHVLSLSFPIR        | 30 |
| P04797 | Glyceraldehyde-3-phosphate dehydrogenase                         | 35805  | 8.14 | 150  | IVSNASCTTNCLAPLAK       | 85 |
| P04797 | Glyceraldehyde-3-phosphate dehydrogenase                         | 35805  | 8.14 | 154  | IVSNASCTTNCLAPLAK       | 64 |
| P04797 | Glyceraldehyde-3-phosphate dehydrogenase                         | 35805  | 8.14 | 245  | VTPNVSVVDLTCR           | 43 |
| Q62638 | Golgi apparatus protein 1                                        | 133469 | 6.52 | 1063 | ADIFVDPVLHTACALDIK      | 35 |
| P04897 | Guanine nucleotide-binding protein G(i), alpha-2 subunit         | 40473  | 5.28 | 66   | IIHEDGYSEEECR           | 46 |
| P04897 | Guanine nucleotide-binding protein G(i), alpha-2 subunit         | 40473  | 5.28 | 140  | LWADHGVQACFGR           | 44 |
| P54313 | Guanine nucleotide-binding protein G(I)/G(S)/G(T) subunit beta-2 | 37307  | 5.6  | 149  | ELPGHTGYLSSCR           | 30 |
| P54313 | Guanine nucleotide-binding protein G(I)/G(S)/G(T) subunit beta-2 | 37307  | 5.6  | 317  | VSCLGVTDGMAVATGSWDSFLK  | 72 |
| P63018 | Heat shock cognate 71 kDa protein                                | 70827  | 5.37 | 17   | GPAVGIDLGTTYSCVGVFQHGK  | 31 |
| Q6URK4 | Heterogeneous nuclear ribonucleoprotein A3                       | 39628  | 9.1  | 64   | WGTLTDCVVMR             | 35 |
| P63159 | High mobility group protein B1                                   | 24878  | 5.62 | 23   | MSSYAFFVQTCR            | 56 |
| Q99J82 | Integrin-linked protein kinase                                   | 51340  | 8.3  | 422  | VALEGLRPTIPPGISPHVCK    | 37 |
| P41565 | Isocitrate dehydrogenase [NAD] subunit gamma, mitochondrial      | 42824  | 9.07 | 81   | HACVPVDFEEVHVSSNADEEDIR | 41 |
| P48679 | Lamin-A                                                          | 74279  | 6.54 | 593  | TVLCGTCGQPADK           | 46 |
| Q62733 | Lamina-associated polypeptide 2, isoform beta                    | 50247  | 9.4  | 362  | EMFPYEASTPTGISASCR      | 45 |
| P35952 | Low-density lipoprotein receptor                                 | 96559  | 4.8  | 858  | TTEDEIHICR              | 33 |

|        |                                                              |        |      |     |                              |    |
|--------|--------------------------------------------------------------|--------|------|-----|------------------------------|----|
| P04636 | Malate dehydrogenase, mitochondrial                          | 35661  | 8.93 | 89  | GYLGPEQLPDCLK                | 34 |
| P97521 | Mitochondrial carnitine/acylcarnitine carrier protein        | 33132  | 9.55 | 58  | LQTQPPSLPGQPPMYSGTIDCFR      | 29 |
| Q64119 | Myosin light polypeptide 6                                   | 16964  | 4.46 | 32  | ILYSQCGDVMR                  | 30 |
| Q62812 | Myosin-9                                                     | 226197 | 5.49 | 988 | KLEEDQIIMEDQNCK              | 31 |
| Q66HF1 | NADH-ubiquinone oxidoreductase 75 kDa subunit, mitochondrial | 79362  | 5.65 | 554 | LLFLLGADGGCITR               | 30 |
| P10111 | Peptidyl-prolyl cis-trans isomerase A                        | 17863  | 8.34 | 62  | IIPGFMCQGGDFTR               | 38 |
| P24368 | Peptidyl-prolyl cis-trans isomerase B                        | 23788  | 9.5  | 202 | DVIIVDCGK                    | 41 |
| P19944 | Peroxisomal biogenesis factor 19                             | 32477  | 4.28 | 128 | LSEAAGRVGSDASSQQEFTSCLK      | 28 |
| P09626 | Potassium-transporting ATPase alpha chain 1                  | 113964 | 5.58 | 383 | NLEAVETLGSTSVICSDK           | 37 |
| Q811A3 | Procollagen-lysine,2-oxoglutarate 5-dioxygenase 2            | 84488  | 6.26 | 494 | DKLDPDMSLCR                  | 31 |
| P67779 | Prohibitin                                                   | 29802  | 5.57 | 69  | GVQDIVVGGEGTHFLIPWVQKPIIFDCR | 34 |
| P11598 | Protein disulfide-isomerase A3                               | 56588  | 5.88 | 244 | FIQESIFGLCPHMTEDNKDLIQGK     | 41 |
| P38659 | Protein disulfide-isomerase A4                               | 72675  | 4.98 | 553 | KDVLIEFYAPWCGHCK             | 28 |
| Q5XID0 | Protein YIPF5                                                | 27885  | 4.2  | 42  | QYAGCEYSQQGR                 | 34 |
| P11980 | Pyruvate kinase isozymes M1/M2                               | 57781  | 6.63 | 358 | AEGSDVANAVLDGADCIMLSGETAK    | 34 |
| Q6RUV5 | Ras-related C3 botulinum toxin substrate 1                   | 21436  | 8.77 | 105 | HHCPNTPHILVGTK               | 36 |
| Q6RUV5 | Ras-related C3 botulinum toxin substrate 1                   | 21436  | 8.77 | 157 | YLECSALTQR                   | 40 |
| P11507 | Sarcoplasmic/endoplasmic reticulum calcium ATPase 2          | 114694 | 5.23 | 560 | CLALATHDNPLR                 | 35 |
| P18596 | Sarcoplasmic/endoplasmic reticulum calcium ATPase 3          | 109289 | 5.51 | 447 | VGEATETALTCLVEK              | 31 |
| O88453 | Scaffold attachment factor B1                                | 104504 | 5.25 | 224 | ILDILGETCK                   | 36 |

|        |                                                             |        |      |      |                          |    |
|--------|-------------------------------------------------------------|--------|------|------|--------------------------|----|
| B0BNF1 | <b>Septin-8</b>                                             | 51220  | 5.74 | 400  | ELEEETNAFNCR             | 53 |
| P06685 | Sodium/potassium-transporting ATPase subunit alpha-1        | 112982 | 5.3  | 211  | IISANGCK                 | 29 |
| P06685 | Sodium/potassium-transporting ATPase subunit alpha-1        | 112982 | 5.3  | 374  | NLEAVETLGSTSTICSDK       | 68 |
| P06685 | Sodium/potassium-transporting ATPase subunit alpha-1        | 112982 | 5.3  | 428  | IAGLCNR                  | 32 |
| P06685 | Sodium/potassium-transporting ATPase subunit alpha-1        | 112982 | 5.3  | 705  | LIIVEGCQR                | 30 |
| P06686 | Sodium/potassium-transporting ATPase subunit alpha-2        | 112145 | 5.39 | 372  | NLEAVETLGSTSTICSDK       | 47 |
| P16086 | Spectrin alpha chain, brain                                 | 284462 | 5.2  | 2233 | TYLLDGSCMVEESGTLESQLEATK | 44 |
| Q5PPL3 | Sterol-4-alpha-carboxylate 3-dehydrogenase, decarboxylating | 40386  | 8.99 | 29   | CTVIGGSGFLGQHMVEQLLSR    | 63 |
| Q5XIM9 | T-complex protein 1 subunit beta                            | 57422  | 6.01 | 395  | SLHDALCVLAQTVK           | 34 |
| Q68FQ0 | T-complex protein 1 subunit epsilon                         | 59499  | 5.51 | 493  | ESNPALGIDCLHK            | 36 |
| Q6P502 | T-complex protein 1 subunit gamma                           | 60608  | 6.23 | 213  | IPGGHIEDSCVLR            | 50 |
| Q5PQX1 | Torsin-1A-interacting protein 1                             | 65609  | 6    | 197  | TPETSVMSEDPI SNLCRPPLR   | 35 |
| P61589 | Transforming protein RhoA                                   | 21768  | 5.83 | 16   | LVIVGDGACGK              | 45 |
| P61589 | Transforming protein RhoA                                   | 21768  | 5.83 | 107  | HFCPNVPIILVGNK           | 41 |
| P61589 | Transforming protein RhoA                                   | 21768  | 5.83 | 159  | IGAFGYMECSAK             | 35 |
| P46462 | Transitional endoplasmic reticulum ATPase                   | 89293  | 5.14 | 522  | GVLFGYPPGCGK             | 62 |
| Q64428 | Trifunctional enzyme subunit alpha, mitochondrial           | 82613  | 9.16 | 349  | ALMGLYNGQVLCK            | 34 |
| P48500 | Triosephosphate isomerase                                   | 26832  | 6.89 | 21   | CLGELICTLNAAK            | 55 |
| P68370 | <b>Tubulin alpha-1A chain</b>                               | 50104  | 4.94 | 347  | TIQFVDWCPTGFK            | 36 |
| Q6P9V9 | Tubulin alpha-1B chain                                      | 50120  | 4.94 | 376  | AVCMLSNTTAIAEAWAR        | 54 |
| Q6P9T8 | Tubulin beta-2C chain                                       | 49769  | 4.79 | 354  | TAVCDIPPR                | 47 |

|        |                                                     |       |      |     |                            |    |
|--------|-----------------------------------------------------|-------|------|-----|----------------------------|----|
| Q4QRB4 | Tubulin beta-3 chain                                | 50386 | 4.82 | 354 | VAVCDIPPR                  | 44 |
| P31000 | <b>Vimentin</b>                                     | 53700 | 5.06 | 328 | QVQSLTCEVDALK              | 41 |
| Q9Z2L0 | Voltage-dependent anion-selective channel protein 1 | 30737 | 8.62 | 232 | YQVDPDACFSAK               | 37 |
| Q9R1Z0 | Voltage-dependent anion-selective channel protein 3 | 30778 | 8.91 | 165 | LCQNNFALGYK                | 44 |
| Q8CGS5 | Zinc phosphodiesterase ELAC protein 2               | 92281 | 7.03 | 218 | QSSSDPGSAENGQCLPEGSSAGVNGK | 29 |

<sup>a</sup>Swiss-Prot accession number.

<sup>b</sup>Calculated molecular weight.

<sup>c</sup>Calculated pI.

<sup>d</sup>S-Guanylated cysteine residue.

Proteins colored in red in this Table are commonly identified in 2D-SDS-PAGE/LC-MS/MS (Supplementary Table S3).
