# Supplementary material
Source: PubMed Central journal article supplement (PMC3887461)
Supplement: Supp_Table2.pdf [file Supp_Table2.pdf]

**Supplementary Table S2. S-Guanylated Proteins in Intact Mitochondria Treated *In Vitro* with 8-Nitro-cGMP, as Identified by Means of Immunoaffinity Capture and LC-MS/MS**

| Acc no. <sup>a</sup> | Protein name                                                             | Mw <sup>b</sup> | pI <sup>c</sup> | Cys no. <sup>d</sup> | Peptide sequence                          | Ions score <sup>e</sup> |
|----------------------|--------------------------------------------------------------------------|-----------------|-----------------|----------------------|-------------------------------------------|-------------------------|
| P63039               | 60 kDa heat shock protein, mitochondrial                                 | 60917           | 5.91            | 442                  | AAVEEGIVLGGGCALLR                         | 64                      |
| P60711               | Actin, cytoplasmic 1                                                     | 41710           | 5.29            | 272                  | CPEALFQPSFLGMESCGIHETTFNSIMK              | 31                      |
| Q505J9               | ATPase family AAA domain-containing protein 1                            | 40691           | 6.43            | 137                  | GVLLYGPPGCGK                              | 27                      |
| P07153               | Dolichyl-diphosphooligosaccharide--protein glycosyltransferase subunit 1 | 68262           | 6.05            | 475                  | VACITEQVLTLVNK                            | 53                      |
| P62630               | Elongation factor 1-alpha 1                                              | 50082           | 9.1             | 363                  | NDPPMEAAGFTAQVIILNHPGQISAGYAPVLDCHTAHIACK | 41                      |
| P62630               | Elongation factor 1-alpha 1                                              | 50082           | 9.1             | 370                  | NDPPMEAAGFTAQVIILNHPGQISAGYAPVLDCHTAHIACK | 41                      |
| P62630               | Elongation factor 1-alpha 1                                              | 50082           | 9.1             | 411                  | SGDAAIVDMVPGKPMCVESFSDYPLGR               | 85                      |
| P04797               | Glyceraldehyde-3-phosphate dehydrogenase                                 | 35805           | 8.14            | 150                  | IVSNASCCTTNCLAPLAK                        | 69                      |
| P48679               | Lamin-A                                                                  | 74279           | 6.54            | 593                  | TVLCGTCGQPADK                             | 48                      |
| Q62736               | Non-muscle caldesmon                                                     | 60548           | 6.34            | 12                   | CLATLSQIAYQR                              | 34                      |
| P37199               | Nuclear pore complex protein Nup155                                      | 154904          | 5.84            | 1343                 | YVENPSLVLNCER                             | 43                      |
| P62747               | Rho-related GTP-binding protein RhoB                                     | 22109           | 5.1             | 20                   | TCLLIVFSK                                 | 31                      |
| B0BNF1               | Septin-8                                                                 | 51220           | 5.74            | 400                  | ELEEETNAFNCR                              | 47                      |
| P48721               | Stress-70 protein, mitochondrial                                         | 73812           | 5.97            | 317                  | AKCELSSSVQTDINLPYLTMDSGPK                 | 47                      |
| P46462               | Transitional endoplasmic reticulum ATPase                                | 89293           | 5.14            | 522                  | GVLFYGGPPGCGK                             | 58                      |
| P48500               | Triosephosphate isomerase                                                | 26832           | 6.89            | 21                   | CLGELICTLNAAK                             | 32                      |
| P85108               | Tubulin beta-2A chain                                                    | 49875           | 4.78            | 12                   | EIVHIQAGQCGNQIGAK                         | 33                      |
| Q4QRB4               | Tubulin beta-3 chain                                                     | 50386           | 4.82            | 12                   | EIVHIQAGQCGNQIGAK                         | 31                      |
| P81155               | Voltage-dependent anion-selective channel protein 2                      | 31726           | 7.44            | 48                   | SCSGVEFSTSGSSNTDTGK                       | 30                      |

|        |                                                     |       |      |    |                     |    |
|--------|-----------------------------------------------------|-------|------|----|---------------------|----|
| Q9R1Z0 | Voltage-dependent anion-selective channel protein 3 | 30778 | 8.91 | 36 | SCSGVEFSTSGHAYTDTGK | 54 |
|--------|-----------------------------------------------------|-------|------|----|---------------------|----|

---

<sup>a</sup>Swiss-Prot accession number.

<sup>b</sup>Calculated molecular weight.

<sup>c</sup>Calculated pI.

<sup>d</sup>S-Guanylated cysteine residue.

Proteins colored in red in this Table are commonly identified in 2D-SDS-PAGE/LC-MS/MS (Supplementary Table S4).
