# Supplementary material
Source: PubMed Central journal article supplement (PMC3887461)
Supplement: Supp_Table3.pdf [file Supp_Table3.pdf]

**Supplementary Table S3. S-Guanylated Proteins in Solubilized Mitochondria Treated *In Vitro* with 8-Nitro-cGMP as Identified by 2D-PAGE and LC-MS/MS**

| Spot no. | Acc no. <sup>a</sup> | Protein name                                    | Sequence coverage (%) | No. of matched peptides | Mascot score | Mw <sup>b</sup> | pI <sup>c</sup> |
|----------|----------------------|-------------------------------------------------|-----------------------|-------------------------|--------------|-----------------|-----------------|
| 1        | Q66HD0               | <b>Endoplasmin</b>                              | 33                    | 26                      | 1106         | 92713           | 4.72            |
| 3        | Q3KR86               | Mitochondrial inner membrane protein (fragment) | 5                     | 4                       | 41           | 67135           | 5.57            |
| 5        | P06761               | 78 kDa glucose-regulated protein                | 56                    | 29                      | 1445         | 72302           | 5.07            |
| 6        | P06761               | 78 kDa glucose-regulated protein                | 10                    | 2                       | 53           | 72302           | 5.07            |
| 7        | P48721               | Stress-70 protein, mitochondrial                | 40                    | 23                      | 1030         | 73812           | 5.97            |
| 7        | P48679               | <b>Prelamin-A/C</b>                             | 19                    | 14                      | 302          | 74279           | 6.54            |
| 7        | P63018               | <b>Heat shock cognate 71 kDa protein</b>        | 10                    | 7                       | 54           | 70827           | 5.37            |
| 8        | P70615               | Lamin-B1                                        | 55                    | 30                      | 1897         | 66566           | 5.16            |
| 8        | P55063               | Heat shock 70 kDa protein 1-like                | 3                     | 2                       | 45           | 70505           | 5.91            |
| 9        | P68370               | <b>Tubulin alpha-1A chain</b>                   | 5                     | 2                       | 42           | 50104           | 4.94            |
| 10       | P61980               | Heterogeneous nuclear ribonucleoprotein K       | 27                    | 12                      | 387          | 50944           | 5.39            |
| 10       | P63039               | <b>60 kDa heat shock protein, mitochondrial</b> | 16                    | 6                       | 34           | 60917           | 5.91            |
| 11       | P31000               | <b>Vimentin</b>                                 | 22                    | 10                      | 89           | 53700           | 5.06            |
| 11       | P18418               | <b>Calreticulin</b>                             | 24                    | 10                      | 87           | 47966           | 4.33            |
| 13       | Q9R064               | Golgi reassembly-stacking protein 2             | 12                    | 5                       | 79           | 47191           | 4.84            |
| 13       | P31000               | <b>Vimentin</b>                                 | 17                    | 8                       | 76           | 53700           | 5.06            |
| 14       | P04785               | Protein disulfide-isomerase                     | 53                    | 26                      | 747          | 56916           | 4.82            |
| 14       | P69897               | Tubulin beta-5 chain                            | 40                    | 14                      | 224          | 49639           | 4.78            |
| 15       | P69897               | Tubulin beta-5 chain                            | 55                    | 18                      | 1404         | 49639           | 4.78            |
| 15       | Q6P9T8               | Tubulin beta-4B chain                           | 49                    | 17                      | 1139         | 49769           | 4.79            |

|    |        |                                                                     |    |    |      |       |      |
|----|--------|---------------------------------------------------------------------|----|----|------|-------|------|
| 15 | P85108 | Tubulin beta-2A chain                                               | 55 | 18 | 1098 | 49875 | 4.78 |
| 15 | P31000 | Vimentin                                                            | 34 | 16 | 351  | 53700 | 5.06 |
| 16 | P10719 | ATP synthase subunit beta,<br>mitochondrial                         | 62 | 22 | 2820 | 56318 | 5.19 |
| 16 | P69897 | Tubulin beta-5 chain                                                | 23 | 8  | 243  | 49639 | 4.78 |
| 16 | Q6P9T8 | Tubulin beta-4B chain                                               | 19 | 7  | 163  | 49769 | 4.79 |
| 16 | P85108 | Tubulin beta-2A chain                                               | 13 | 5  | 118  | 49875 | 4.78 |
| 17 | P31000 | Vimentin                                                            | 56 | 27 | 890  | 53700 | 5.06 |
| 17 | P10719 | ATP synthase subunit beta,<br>mitochondrial                         | 30 | 7  | 313  | 56318 | 5.19 |
| 18 | P10719 | ATP synthase subunit beta,<br>mitochondrial                         | 45 | 17 | 630  | 56318 | 5.19 |
| 18 | P31000 | Vimentin                                                            | 31 | 14 | 445  | 53700 | 5.06 |
| 18 | Q63081 | Protein disulfide-isomerase A6                                      | 22 | 8  | 358  | 48143 | 5    |
| 19 | Q68FY0 | Cytochrome b-c1 complex subunit 1,<br>mitochondrial                 | 22 | 10 | 633  | 52815 | 5.57 |
| 19 | P60711 | Actin, cytoplasmic 1                                                | 18 | 7  | 171  | 41710 | 5.29 |
| 20 | P60711 | Actin, cytoplasmic 1                                                | 42 | 12 | 478  | 41710 | 5.29 |
| 20 | P62738 | Actin, aortic smooth muscle                                         | 32 | 10 | 226  | 41982 | 5.23 |
| 21 | P60711 | Actin, cytoplasmic 1                                                | 56 | 16 | 1639 | 41710 | 5.29 |
| 21 | P62738 | Actin, aortic smooth muscle                                         | 24 | 9  | 522  | 41982 | 5.23 |
| 22 | P60711 | Actin, cytoplasmic 1                                                | 53 | 15 | 1317 | 41710 | 5.29 |
| 22 | P62738 | Actin, aortic smooth muscle                                         | 24 | 9  | 531  | 41982 | 5.23 |
| 23 | Q68A21 | Transcriptional activator protein<br>Pur-beta                       | 3  | 2  | 55   | 33398 | 5.35 |
| 27 | P55260 | Annexin A4                                                          | 26 | 8  | 91   | 35826 | 5.31 |
| 28 | P54313 | Guanine nucleotide-binding protein<br>G(I)/G(S)/G(T) subunit beta-2 | 55 | 12 | 664  | 37307 | 5.6  |

|    |        |                                                                     |    |    |      |       |      |
|----|--------|---------------------------------------------------------------------|----|----|------|-------|------|
| 28 | P54311 | Guanine nucleotide-binding protein<br>G(I)/G(S)/G(T) subunit beta-1 | 40 | 10 | 597  | 37353 | 5.6  |
| 29 | P37397 | Calponin-3                                                          | 19 | 4  | 36   | 36412 | 5.47 |
| 30 | P37397 | Calponin-3                                                          | 10 | 3  | 59   | 36412 | 5.47 |
| 32 | P19945 | 60S acidic ribosomal protein P0                                     | 46 | 13 | 443  | 34194 | 5.91 |
| 36 | P19945 | 60S acidic ribosomal protein P0                                     | 45 | 24 | 259  | 34194 | 5.91 |
| 38 | P04764 | Alpha-enolase                                                       | 11 | 5  | 61   | 47098 | 6.16 |
| 39 | P15999 | ATP synthase subunit alpha,<br>mitochondrial                        | 39 | 20 | 353  | 59717 | 9.22 |
| 39 | P10719 | ATP synthase subunit beta,<br>mitochondrial                         | 28 | 12 | 266  | 56318 | 5.19 |
| 39 | B0BNF1 | Septin-8                                                            | 4  | 3  | 35   | 51220 | 5.74 |
| 40 | B0BNF1 | Septin-8                                                            | 15 | 6  | 100  | 51220 | 5.74 |
| 41 | P11598 | Protein disulfide-isomerase A3                                      | 37 | 19 | 396  | 56588 | 5.88 |
| 41 | P63039 | 60 kDa heat shock protein,<br>mitochondrial                         | 24 | 9  | 101  | 60917 | 5.91 |
| 42 | P04764 | Alpha-enolase                                                       | 43 | 15 | 197  | 47098 | 6.16 |
| 45 | B3GNI6 | Septin-11                                                           | 21 | 8  | 218  | 49663 | 6.24 |
| 46 | P10860 | Glutamate dehydrogenase 1,<br>mitochondrial                         | 34 | 16 | 225  | 61377 | 8.05 |
| 46 | B3GNI6 | Septin-11                                                           | 10 | 4  | 68   | 49663 | 6.24 |
| 47 | Q91Y81 | Septin-2                                                            | 22 | 6  | 40   | 41566 | 6.15 |
| 49 | Q6AY23 | Pyrroline-5-carboxylate reductase 2                                 | 3  | 1  | 73   | 33652 | 7.67 |
| 50 | Q07936 | Annexin A2                                                          | 2  | 1  | 50   | 38654 | 7.55 |
| 51 | Q07936 | Annexin A2                                                          | 35 | 12 | 486  | 38654 | 7.55 |
| 51 | P04797 | Glyceraldehyde-3-phosphate<br>dehydrogenase                         | 22 | 7  | 251  | 35805 | 8.14 |
| 52 | P48679 | Prelamin-A/C                                                        | 50 | 31 | 1538 | 74279 | 6.54 |

|    |        |              |    |    |      |       |      |
|----|--------|--------------|----|----|------|-------|------|
| 53 | P48679 | Prelamin-A/C | 44 | 28 | 1636 | 74279 | 6.54 |
| 54 | P48679 | Prelamin-A/C | 52 | 34 | 1857 | 74279 | 6.54 |
| 55 | P48679 | Prelamin-A/C | 47 | 29 | 1382 | 74279 | 6.54 |

---

<sup>a</sup>Swiss-Prot accession number.

<sup>b</sup>Calculated molecular weight.

<sup>c</sup>Calculated pI.

Proteins colored in red in this Table are commonly identified in immunoaffinity capture/LC-MS/MS (Supplementary Table S1).
