# Supplementary material
Source: PubMed Central journal article supplement (PMC3887461)
Supplement: Supp_Table4.pdf [file Supp_Table4.pdf]

**Supplementary Table S4. S-Guanylated Proteins in Intact Mitochondria Treated *In Vitro* with 8-Nitro-cGMP as Identified by Means of 2D-PAGE and LC-MS/MS**

| Spot no. | Acc no. <sup>a</sup> | Protein name                             | Sequence coverage (%) | No. of matched peptides | Mascot score | Mw <sup>b</sup> | pI <sup>c</sup> |
|----------|----------------------|------------------------------------------|-----------------------|-------------------------|--------------|-----------------|-----------------|
| 1        | Q66HD0               | Endoplasmin                              | 52                    | 34                      | 1328         | 92713           | 4.72            |
| 3        | P06761               | 78 kDa glucose-regulated protein         | 64                    | 30                      | 2094         | 72302           | 5.07            |
|          | P31000               | Vimentin                                 | 34                    | 11                      | 152          | 53700           | 5.06            |
| 4        | P48721               | Stress-70 protein, mitochondrial         | 54                    | 30                      | 2293         | 73812           | 5.97            |
|          | P48679               | Prelamin-A/C                             | 23                    | 15                      | 167          | 74279           | 6.54            |
|          | P48037               | Annexin A6                               | 5                     | 3                       | 53           | 75706           | 5.39            |
| 5        | P48721               | Stress-70 protein, mitochondrial         | 64                    | 33                      | 2917         | 73812           | 5.97            |
| 6        | P63039               | 60 kDa heat shock protein, mitochondrial | 63                    | 26                      | 3169         | 60917           | 5.91            |
| 7        | P31000               | Vimentin                                 | 80                    | 33                      | 2716         | 53700           | 5.06            |
|          | P68370               | Tubulin alpha-1A chain                   | 40                    | 14                      | 701          | 50104           | 4.94            |
| 8        | P69897               | Tubulin beta-5 chain                     | 46                    | 16                      | 1186         | 49639           | 4.78            |
|          | P85108               | Tubulin beta-2A chain                    | 46                    | 16                      | 1059         | 49875           | 4.78            |
|          | Q6P9T8               | Tubulin beta-4B chain                    | 40                    | 15                      | 998          | 49769           | 4.79            |
|          | Q4QRB4               | Tubulin beta-3 chain                     | 28                    | 10                      | 672          | 50386           | 4.82            |
|          | P10719               | ATP synthase subunit beta, mitochondrial | 12                    | 5                       | 97           | 56318           | 5.19            |
| 9        | P10719               | ATP synthase subunit beta, mitochondrial | 59                    | 21                      | 2118         | 56318           | 5.19            |
| 10       | P11598               | Protein disulfide-isomerase A3           | 20                    | 10                      | 190          | 56588           | 5.88            |
| 11       | P11598               | Protein disulfide-isomerase A3           | 35                    | 18                      | 506          | 56588           | 5.88            |
| 12       | P63259               | Actin, cytoplasmic 2                     | 69                    | 18                      | 2208         | 41766           | 5.31            |
|          | P62738               | Actin, aortic smooth muscle              | 33                    | 12                      | 643          | 41982           | 5.23            |

|    |        |                                              |    |    |      |       |      |
|----|--------|----------------------------------------------|----|----|------|-------|------|
| 13 | P63259 | Actin, cytoplasmic 2                         | 25 | 9  | 234  | 41766 | 5.31 |
| 14 | Q4FZT0 | Stomatin-like protein 2                      | 73 | 16 | 639  | 38390 | 8.74 |
| 16 | P48679 | Prelamin-A/C                                 | 31 | 20 | 777  | 74279 | 6.54 |
|    | O35763 | Moesin                                       | 15 | 7  | 62   | 67697 | 6.16 |
| 17 | P48679 | Prelamin-A/C                                 | 52 | 31 | 1233 | 74279 | 6.54 |
| 18 | P48679 | Prelamin-A/C                                 | 61 | 35 | 1780 | 74279 | 6.54 |
| 19 | P48679 | Prelamin-A/C                                 | 46 | 29 | 1281 | 74279 | 6.54 |
|    | Q9QZR6 | Septin-9                                     | 8  | 5  | 39   | 63752 | 8.65 |
| 20 | P48679 | Prelamin-A/C                                 | 41 | 26 | 611  | 74279 | 6.54 |
|    | Q9QZR6 | Septin-9                                     | 26 | 15 | 184  | 63752 | 8.65 |
| 21 | O35567 | Bifunctional purine biosynthesis protein     | 9  | 3  | 33   | 64168 | 6.69 |
| 22 | P11980 | Pyruvate kinase isozymes M1/M2               | 10 | 5  | 89   | 57781 | 6.63 |
| 23 | P11980 | Pyruvate kinase isozymes M1/M2               | 41 | 18 | 446  | 57781 | 6.63 |
|    | P04762 | Catalase                                     | 20 | 9  | 104  | 59719 | 7.07 |
| 24 | P10860 | Glutamate dehydrogenase 1,<br>mitochondrial  | 59 | 25 | 1438 | 61377 | 8.05 |
|    | P15999 | ATP synthase subunit alpha,<br>mitochondrial | 42 | 20 | 512  | 59717 | 9.22 |
| 25 | Q99MZ8 | LIM and SH3 domain protein 1                 | 14 | 4  | 81   | 29951 | 6.61 |
| 26 | Q07936 | Annexin A2                                   | 64 | 19 | 925  | 38654 | 7.55 |
|    | P04797 | Glyceraldehyde-3-phosphate<br>dehydrogenase  | 34 | 8  | 198  | 35805 | 8.14 |
| 27 | P04797 | Glyceraldehyde-3-phosphate<br>dehydrogenase  | 52 | 12 | 667  | 35805 | 8.14 |
|    | Q07936 | Annexin A2                                   | 55 | 17 | 489  | 38654 | 7.55 |
|    | P36202 | PDZ and LIM domain protein 4                 | 5  | 2  | 38   | 35499 | 8.54 |
|    | P24329 | Thiosulfate sulfurtransferase                | 16 | 5  | 32   | 33386 | 7.71 |

|    |        |                                                             |    |    |      |       |      |
|----|--------|-------------------------------------------------------------|----|----|------|-------|------|
| 28 | P04797 | Glyceraldehyde-3-phosphate dehydrogenase                    | 82 | 19 | 1361 | 35805 | 8.14 |
|    | P36202 | PDZ and LIM domain protein 4                                | 11 | 3  | 76   | 35499 | 8.54 |
|    | P04636 | Malate dehydrogenase, mitochondrial                         | 24 | 7  | 51   | 35661 | 8.93 |
| 30 | P81155 | Voltage-dependent anion-selective channel protein 2         | 3  | 1  | 60   | 31726 | 7.44 |
| 32 | P13803 | Electron transfer flavoprotein subunit alpha, mitochondrial | 55 | 14 | 605  | 34929 | 8.62 |
|    | P81155 | Voltage-dependent anion-selective channel protein 2         | 47 | 11 | 449  | 31726 | 7.44 |
| 33 | Q9Z2L0 | Voltage-dependent anion-selective channel protein 1         | 13 | 3  | 72   | 30737 | 8.62 |
| 34 | Q9Z2L0 | Voltage-dependent anion-selective channel protein 1         | 43 | 10 | 419  | 30737 | 8.62 |

<sup>a</sup>Swiss-Prot accession number.

<sup>b</sup>Calculated molecular weight.

<sup>c</sup>Calculated pI.

Proteins colored in red in this Table are commonly identified in immunoaffinity capture/LC-MS/MS (Supplementary Table S2).
