# Supplementary material
Source: PubMed Central journal article supplement (PMC3887461)
Supplement: Supp_Table5.pdf [file Supp_Table5.pdf]

**Supplementary Table S5. Endogenously S-Guanylated Proteins in Mitochondria from Untreated Cells as Identified by Means of 2D-PAGE and LC-MS/MS<sup>a</sup>**

| Spot no. | Acc no. <sup>b</sup> | Protein name                              | Sequence coverage (%) | No. of matched peptides | Mascot score | Mw <sup>c</sup> | pI <sup>d</sup> |
|----------|----------------------|-------------------------------------------|-----------------------|-------------------------|--------------|-----------------|-----------------|
| 3        | P61980               | Heterogeneous nuclear ribonucleoprotein K | 31                    | 12                      | 131          | 50944           | 5.39            |
| 4        | P69897               | Tubulin beta-5 chain                      | 54                    | 17                      | 756          | 49639           | 4.78            |
| 4        | P85108               | Tubulin beta-2A chain                     | 48                    | 15                      | 745          | 49875           | 4.78            |
| 4        | Q6P9T8               | Tubulin beta-4B chain                     | 48                    | 16                      | 665          | 49769           | 4.79            |
| 5        | P10719               | ATP synthase subunit beta, mitochondrial  | 47                    | 18                      | 1516         | 56318           | 5.19            |
| 6        | Q63081               | Protein disulfide-isomerase A6            | 38                    | 12                      | 419          | 48143           | 5               |
| 6        | Q6AYH5               | Dynactin subunit 2                        | 37                    | 11                      | 323          | 44121           | 5.14            |
| 7        | P60711               | Actin, cytoplasmic 1                      | 17                    | 6                       | 102          | 41710           | 5.29            |
| 8        | P60711               | Actin, cytoplasmic 1                      | 44                    | 13                      | 1042         | 41710           | 5.29            |
| 8        | P62738               | Actin, aortic smooth muscle               | 23                    | 8                       | 496          | 41982           | 5.23            |
| 9        | P60711               | Actin, cytoplasmic 1                      | 59                    | 17                      | 1960         | 41710           | 5.29            |
| 9        | P68035               | Actin, alpha cardiac muscle 1             | 41                    | 14                      | 543          | 41992           | 5.23            |
| 10       | P60711               | Actin, cytoplasmic 1                      | 59                    | 15                      | 412          | 41710           | 5.29            |

<sup>a</sup>Proteins identified in experiment number 1.

<sup>b</sup>Swiss-Prot accession number.

<sup>c</sup>Calculated molecular weight.

<sup>d</sup>Calculated pI.
