# Supplementary material
Source: PubMed Central journal article supplement (PMC3887461)
Supplement: Supp_Table6.pdf [file Supp_Table6.pdf]

**Supplementary Table S6. Endogenously S-Guanylated Proteins in Mitochondria from LPS/Cytokine-stimulated Cells as Identified by Means of 2D-PAGE and LC-MS/MS<sup>a</sup>**

| Spot no. | Acc no. <sup>b</sup> | Protein name                              | Sequence coverage (%) | No. of matched peptides | Mascot score | Mw <sup>c</sup> | pI <sup>d</sup> |
|----------|----------------------|-------------------------------------------|-----------------------|-------------------------|--------------|-----------------|-----------------|
| 3        | P61980               | Heterogeneous nuclear ribonucleoprotein K | 19                    | 8                       | 132          | 50944           | 5.39            |
| 4        | P69897               | Tubulin beta-5 chain                      | 51                    | 17                      | 973          | 49639           | 4.78            |
| 4        | P85108               | Tubulin beta-2A chain                     | 48                    | 16                      | 864          | 49875           | 4.78            |
| 4        | Q6P9T8               | Tubulin beta-4B chain                     | 46                    | 16                      | 803          | 49769           | 4.79            |
| 4        | Q4QRB4               | Tubulin beta-3 chain                      | 32                    | 12                      | 489          | 50386           | 4.82            |
| 4        | P31000               | Vimentin                                  | 38                    | 17                      | 540          | 53700           | 5.06            |
| 4        | P10719               | ATP synthase subunit beta, mitochondrial  | 11                    | 5                       | 93           | 56318           | 5.19            |
| 5        | P10719               | ATP synthase subunit beta, mitochondrial  | 53                    | 20                      | 1787         | 56318           | 5.19            |
| 7        | P60711               | Actin, cytoplasmic 1                      | 46                    | 14                      | 1180         | 41710           | 5.29            |
| 7        | P62738               | Actin, aortic smooth muscle               | 29                    | 11                      | 433          | 41982           | 5.23            |
| 8        | P60711               | Actin, cytoplasmic 1                      | 60                    | 18                      | 1266         | 41710           | 5.29            |
| 8        | P62738               | Actin, aortic smooth muscle               | 32                    | 11                      | 512          | 41982           | 5.23            |
| 18       | P48721               | Stress-70 protein, mitochondrial          | 54                    | 28                      | 816          | 73812           | 5.97            |
| 19       | P48721               | Stress-70 protein, mitochondrial          | 63                    | 33                      | 2770         | 73812           | 5.97            |
| 20       | P48721               | Stress-70 protein, mitochondrial          | 40                    | 21                      | 647          | 73812           | 5.97            |
| 21       | P48721               | Stress-70 protein, mitochondrial          | 7                     | 3                       | 167          | 73812           | 5.97            |
| 25       | P48679               | Prelamin-A/C                              | 12                    | 6                       | 60           | 74279           | 6.54            |
| 28       | P31000               | Vimentin                                  | 72                    | 31                      | 1859         | 53700           | 5.06            |
| 29       | P31000               | Vimentin                                  | 55                    | 25                      | 688          | 53700           | 5.06            |
| 29       | P61980               | Heterogeneous nuclear                     | 40                    | 15                      | 398          | 50944           | 5.39            |

---

|    |        |                                                                    |    |    |      |       |      |
|----|--------|--------------------------------------------------------------------|----|----|------|-------|------|
| 30 | P63039 | ribonucleoprotein K<br>60 kDa heat shock protein,<br>mitochondrial | 78 | 31 | 2638 | 60917 | 5.91 |
|----|--------|--------------------------------------------------------------------|----|----|------|-------|------|

---

<sup>a</sup>Proteins identified in experiment number 1.

<sup>b</sup>Swiss-Prot accession number.

<sup>c</sup>Calculated molecular weight.

<sup>d</sup>Calculated pI.
